# Supplementary material for: Identification of thyroid hormone receptor binding sites in developing mouse cerebellum
Source: PubMed Central journal article supplement (PMC3716714; doi:10.1186/1471-2164-14-341), 2013-05-23

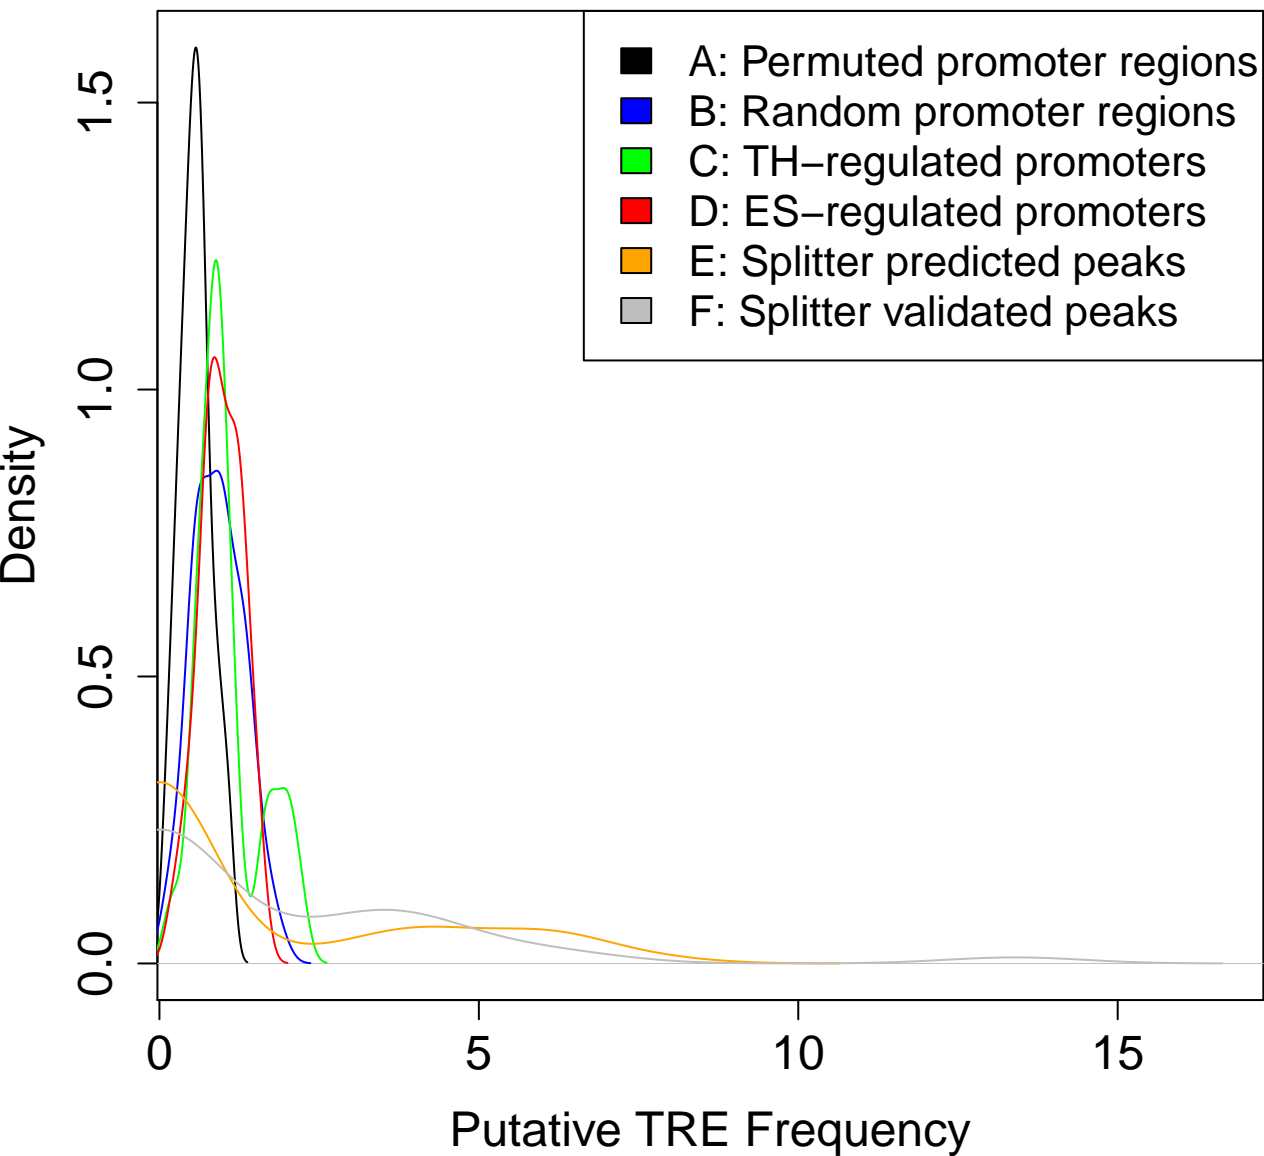

Supplement: 1471-2164-14-341-S8.pdf [file 1471-2164-14-341-S8.pdf]
